# Supplementary material for: Tryptophan, Kynurenine and Kynurenic Acid Concentrations in Milk and Serum of Dairy Cows with Prototheca Mastitis
Source: MDPI journal article supplement (doi:10.3390/ani11123608), 2021-12-20
Supplement: s1 [file s1]

**Table S1.** Complete blood test cel results for both cows with *Prototheca* mastitis and healthy (control) animals.

|                               | WBC<br>[10 <sup>3</sup> /mL] | RBC<br>[10 <sup>6</sup> /mL] | HT<br>[%]   | HGB<br>[g/dL] | PLT<br>[10 <sup>3</sup> /mL] | LYM<br>[%]  | GRAN<br>[%] | EOS<br>[%]  | MON<br>[%] | BAS<br>[%] |
|-------------------------------|------------------------------|------------------------------|-------------|---------------|------------------------------|-------------|-------------|-------------|------------|------------|
| <i>Prototheca</i><br>mastitis |                              |                              |             |               |                              |             |             |             |            |            |
| 1.                            | 8.0                          | 6.44                         | 30.2        | 10.6          | 364                          | 50          | 39          | 7           | 4          | 0          |
| 2                             | 11.1                         | 8.98                         | 40          | 13.4          | 401                          | 61          | 31          | 4           | 3          | 1          |
| 3                             | 5.2                          | 5.58                         | 25.7        | 8.8           | 480                          | 53          | 33          | 8           | 5          | 1          |
| 4                             | 6.8                          | 6.74                         | 34.9        | 11.3          | 772                          | 56          | 29          | 13          | 0          | 2          |
| 5                             | 5.1                          | 5.66                         | 24.3        | 8.1           | 553                          | 52          | 32          | 15          | 1          | 0          |
| 6                             | 5.0                          | 5.30                         | 24.2        | 8.2           | 648                          | 37          | 15          | 44          | 3          | 1          |
| 7                             | 7.6                          | 5.71                         | 26.6        | 8.9           | 425                          | 43          | 40          | 14          | 2          | 1          |
| 8                             | 5.2                          | 5.63                         | 27.6        | 9.5           | 549                          | 40          | 24          | 35          | 1          | 0          |
| 9                             | 5.9                          | 4.83                         | 22.6        | 7.4           | 475                          | 66          | 23          | 11          | 0          | 0          |
| 10                            | 7.1                          | 7.9                          | 31.7        | 11.2          | 276                          | 38          | 30          | 27          | 5          | 0          |
| Mean                          | <b>6.7</b>                   | <b>6.3</b>                   | <b>28.8</b> | <b>9.7</b>    | <b>494.3</b>                 | <b>49.6</b> | <b>29.6</b> | <b>17.8</b> | <b>2.4</b> | <b>0.6</b> |
| Control                       |                              |                              |             |               |                              |             |             |             |            |            |
| 1                             | 5.0                          | 5.78                         | 30.3        | 10.1          | 391                          | 52          | 35          | 6           | 6          | 1          |
| 2                             | 6.3                          | 6.17                         | 25.8        | 8.7           | 630                          | 45          | 44          | 7           | 3          | 1          |
| 3                             | 5.8                          | 6.90                         | 32.5        | 10.6          | 358                          | 57          | 35          | 3           | 5          | 0          |
| 4                             | 8.8                          | 7.03                         | 27.2        | 8.7           | 624                          | 55          | 33          | 10          | 2          | 0          |
| 5                             | 7.3                          | 6.02                         | 24.9        | 8.3           | 488                          | 58          | 34          | 6           | 1          | 1          |
| 6                             | 5.9                          | 6.13                         | 28.8        | 9.6           | 375                          | 44          | 40          | 13          | 1          | 2          |
| 7                             | 5.7                          | 6.73                         | 31.7        | 10.4          | 249                          | 62          | 28          | 4           | 5          | 1          |
| 8                             | 5.9                          | 7.43                         | 33.5        | 10.9          | 387                          | 55          | 29          | 3           | 12         | 1          |
| 9                             | 8.0                          | 5.02                         | 21.5        | 7.2           | 620                          | 55          | 35          | 9           | 1          | 0          |
| 10                            | 7.6                          | 6.33                         | 26.8        | 8.9           | 407                          | 72          | 18          | 7           | 3          | 0          |
| Mean                          | <b>6.6</b>                   | <b>6.3</b>                   | <b>28.3</b> | <b>9.3</b>    | <b>452.9</b>                 | <b>55.5</b> | <b>33.1</b> | <b>6.8</b>  | <b>3.9</b> | <b>0.7</b> |
